# Supplementary material
Source: MDPI journal article supplement (https://www.mdpi.com/2071-1050/15/7/5867)
Supplement: s1 [file s1 › sustainability-2269846-supplementary.pdf]

Table. S1. Items used in the study

| Factor                  | Code  | Items                                                                                                                 | References                                    |
|-------------------------|-------|-----------------------------------------------------------------------------------------------------------------------|-----------------------------------------------|
| Agreeableness           | AGR1  | I feel little concern for others                                                                                      | Goldberg 1990 [20]                            |
|                         | AGR2  | I am interested in people                                                                                             |                                               |
|                         | AGR3  | I take time out for others                                                                                            |                                               |
| Openness to experience  | OPE1  | I have a creative imagination                                                                                         | Dutta and Hwang 2017 [51]; Goldberg 1990 [20] |
|                         | OPE2  | I am quick to understand things                                                                                       |                                               |
|                         | OPE3  | I have excellent ideas                                                                                                |                                               |
|                         | OPE4  | I delight in thinking about things                                                                                    |                                               |
|                         | OPE5  | I delight in looking for a profound implication in things                                                             |                                               |
| Neuroticism             | NEUR1 | I get stressed out easily                                                                                             | Goldberg 1990 [20]                            |
|                         | NEUR2 | I am worried about the things                                                                                         |                                               |
|                         | NEUR3 | I am easily disturbed                                                                                                 |                                               |
| Conscientiousness       | CNS1  | I pay attention to details                                                                                            | Dutta and Hwang 2017 [51]; Goldberg 1990 [20] |
|                         | CNS2  | I am always prepared                                                                                                  |                                               |
|                         | CNS3  | I follow a schedule                                                                                                   |                                               |
|                         | CNS4  | I make policies and stick to them                                                                                     |                                               |
| Extraversion            | EXT1  | I am the life of party                                                                                                | Dutta and Hwang 2017 [51]; Goldberg 1990 [20] |
|                         | EXT2  | I feel comfortable around people                                                                                      |                                               |
|                         | EXT3  | Generally, I start the conversation                                                                                   |                                               |
|                         | EXT4  | I don't mind being the heart of consideration                                                                         |                                               |
| Personal innovativeness | PI1   | If I heard about a new e-learning system, I would look for ways to experiment with it.                                |                                               |
|                         | PI2   | Among my peers, I am usually the first to explore new educational information technologies such as e-learning system. |                                               |
|                         | PI3   | I like to experiment with new educational information technologies, e-learning system.                                |                                               |
|                         | PI4   | Generally, I would not hesitant to try out new educational information system such as e-learning.                     |                                               |
| System usability        | SU1   | I expect using e-learning system will improve the quality of my learning                                              |                                               |
|                         | SU2   | I believe using e-learning system will allow me to better control over my learning schedule                           |                                               |
|                         | SU3   | I expect using e-learning system would allow me to finish learning task more quickly                                  |                                               |
|                         | SU4   | I expect using e-learning system would allow me to finish more learning task within my work schedule than before      |                                               |
|                         | SU5   | I believe using e-learning system would improve my overall usability in my learning process.                          |                                               |
|                         | SU6   | Overall, using e-learning system would be a useful tool in my learning process                                        |                                               |

|                     |       |                                                                                          |  |
|---------------------|-------|------------------------------------------------------------------------------------------|--|
| E-learning adoption | BINT1 | I intend to use e-learning environment in the near future to manage my learning process. |  |
|                     | BINT2 | I plan to use e-learning environment in the near future to manage my learning process.   |  |
|                     | BINT3 | My willingness to use e-learning environment is high.                                    |  |
|                     | BINT4 | Whatsoever the environments, I do not intend to use e-learning environment.              |  |
